# Supplementary material for: In vivo patch-clamp recordings reveal distinct subthreshold signatures and threshold dynamics of midbrain dopamine neurons
Source: Nat Commun. 2020 Dec 8;11:6286. doi: 10.1038/s41467-020-20041-2 (PMC7722714; doi:10.1038/s41467-020-20041-2)
Supplement: Supplementary file 4 — Source Data [file 41467_2020_20041_MOESM4_ESM.xls]

## Sheet: Fig 1E
Mean Firing Rate (Hz)
Cell #	Value
1	1.25
2	0.742857
3	2.21429
4	3.82
5	2.29508
6	5.02
7	5.84
8	3.02
9	6.96
10	1.1
11	4.28
12	8.17
13	3.93
14	6.32
15	3.92727
16	5.23
17	6.00833
18	2.66364
19	7.79
20	3.65455
21	5.81818
22	9
23	3.56364
24	4.58182
25	8.73
26	2.55455
27	3.9
28	7.52727
29	7.43636
30	7.91
31	3.16364
32	5.05455
33	7.8
34	7.45
35	3.8
36	8.85
37	6.64
38	6.58333
39	8.38
40	4.83333
41	5.475
42	4.75
43	3.04286
44	8.26667
45	2.78182
46	7.88
47	7.26667
48	4.34
49	3.22
50	4.2
51	3.96
52	5.44
53	5.78333
54	6.96
55	6.03333
56	9.51667
57	3.44
58	4.22
59	2.96
60	6.32
61	8.32
62	6.12
63	7.08
64	5.86667
65	5.95
66	9.13333
67	5.53333
68	3.62
69	3.64
70	2.43333
71	5.58
72	4.05
73	5.94167
74	5.31
75	2.74167
76	3.87273
77	3.01667
78	7.58
79	5.77273
80	3.88462
81	3.47143
82	1.38333
83	6.54
84	5.11667
85	7.12
86	2.44
87	5.93333
88	5.075
89	0.550336
90	5.30401
91	3.76982
92	3.76645
93	6.33333
94	5.49542
95	2.53717
96	2.27949
97	8.71
98	6.48855
99	7.19274
100	7.20831
101	6.76062
102	3.46032
103	4.25145
104	5.47826
105	5.65952
106	11.791
107	3.28155
108	2.09615
109	8.41415
110	1.59898

## Sheet: Fig 1F
CV of ISI (%)
Cell #	Value
1	17.4279
2	39.2936
3	16.1092
4	21.7559
5	26.403
6	22.2616
7	18.7358
8	77.2683
9	41.2845
10	57.3802
11	24.2359
12	47.1591
13	108.38
14	41.729
15	45.0745
16	77.1814
17	22.737
18	17.7312
19	15.8976
20	45.8644
21	118.291
22	23.2531
23	66.2658
24	35.1038
25	27.2971
26	49.7244
27	37.4982
28	33.2603
29	21.4129
30	55.9499
31	31.3405
32	41.6947
33	21.6089
34	33.4948
35	78.1665
36	48.4724
37	31.241
38	22.4128
39	51.8587
40	25.5827
41	37.1681
42	24.8078
43	48.7454
44	22.2954
45	72.8841
46	38.9068
47	14.94
48	32.2912
49	47.4577
50	39.9264
51	79.9162
52	39.9426
53	30.2898
54	17.0197
55	58.6439
56	53.5874
57	31.1147
58	104.852
59	29.97
60	13.5
61	25.0557
62	24.2261
63	34.7924
64	130.967
65	71.6218
66	36.7036
67	55.2036
68	68.3635
69	38.1905
70	65.3398
71	77.8468
72	49.0793
73	121.731
74	60.7423
75	87.783
76	25.8312
77	88.9675
78	165.709
79	35.2216
80	49.2403
81	84.9034
82	68.07
83	96.5324
84	43.2055
85	30.6888
86	58.0296
87	74.1152
88	34.4821
89	66.2486
90	31.9546
91	58.4677
92	69.0618
93	15.7845
94	87.4742
95	62.2292
96	45.34
97	40.2933
98	41.7809
99	52.2063
100	37.9456
101	44.9098
102	44.5825
103	106.903
104	85.0373
105	51.3112
106	64.1913
107	73.1735
108	52.6476
109	19.682
110	38.3062

## Sheet: Fig 1G
Input Resistance (Mohm)
Cell #	Value
1	6.31975e+08
2	596093750
3	582031250
4	5.24171e+08
5	482078125
6	4.31507e+08
7	4.16742e+08
8	3.68637e+08
9	3.46245e+08
10	341156250
11	3.40506e+08
12	3.23885e+08
13	3.16549e+08
14	3.15468e+08
15	3.11309e+08
16	3.04115e+08
17	303828125
18	2.95855e+08
19	2.94464e+08
20	2.8582e+08
21	2.85446e+08
22	2.56159e+08
23	2.37841e+08
24	2.37586e+08
25	2.29714e+08
26	2.28146e+08
27	2.26009e+08
28	2.23968e+08
29	2.18516e+08
30	2.03587e+08
31	2.01367e+08
32	1.99612e+08
33	197656250
34	1.94107e+08
35	1.68096e+08
36	1.49633e+08

## Sheet: Fig 3K
Change in spike threshold				Change in max dV/dt
Cell #	Spike2-Spike1	Spike 3 - Spike 2		Cell #	Spike2-Spike1	Spike 3 - Spike 2
1	0.0283116	0.0211667		1	-0.0821943	-0.101035
2	0.0012127	0.00251539		2	-0.0210286	-0.0266819
3	0.000181928	0.00157318		3	-0.00743485	-0.00887209
4	-0.00199628	0.00477363		4	-0.0236454	-0.0386628
5	-0.00192219	0.00434303		5	-0.0176534	-0.0254316
6	-0.0210076	-0.00832834		6	0.0130125	-0.0814014
7	-0.00368616	-0.00572938		7	0.0201095	0.0110105
8	-0.0576835	-0.00353804		8	0.0299139	0.00215168
9	-0.00431012	-0.00134241		9	0.00363591	0.00199597
10	0.00394231	0.00163753		10	-0.0173023	-0.00945334

## Sheet: Fig 4K
Change in spike threshold				Change in max dV/dt
Cell #	Spike2-Spike1	Spike 3 - Spike 2		Cell #	Spike2-Spike1	Spike 3 - Spike 2
1	-1.81468	0.812957		1	3.35574	-1.15754
2	-5.72358	1.08299		2	13.6987	-3.15915
3	-2.50217	0.996341		3	8.13301	-2.6278
4	-3.32388	0.97271		4	13.6049	-4.00663
5	-2.22747	0.939045		5	17.3843	-8.79358
6	-2.90824	1.40782		6	21.963	-11.4783
7	-2.39642	0.796486		7	17.2716	-6.45689
8	-5.6249	1.06795		8	37.9384	-8.24518
9	-4.91817	1.15291		9	15.3167	-4.04304
10	-5.68963	1.0618		10	33.4904	-6.93826

## Sheet: Fig 5K
Change in spike threshold				Change in max dV/dt
Cell #	Spike2-Spike1	Spike 3 - Spike 2		Cell #	Spike2-Spike1	Spike 3 - Spike 2
1	1.25087	4.81231		1	-4.22987	-17.9508
2	0.623234	3.61821		2	0.114023	-6.73427
3	-0.348558	1.3681		3	0.560334	-3.88447
4	0.606605	3.67632		4	-3.25154	-12.8952
5	0.0715123	4.50161		5	-0.675512	-18.8155
6	-0.675581	6.42498		6	1.69358	-17.2384
7	1.36057	2.18946		7	-9.88127	-14.645
8	-0.407209	5.831		8	-0.117545	-3.97094
9	0.922947	13.1343		9	-1.97005	-18.6486
10	0.172304	7.80495		10	-0.331494	-14.1191

## Sheet: Fig 6K
Change in spike threshold				Change in max dV/dt
Cell #	Spike2-Spike1	Spike 3 - Spike 2		Cell #	Spike2-Spike1	Spike 3 - Spike 2
1	-2.006	0.922165		1	6.96735	-2.40106
2	-2.41598	1.55343		2	7.5102	-2.90916
3	-2.17661	0.610199		3	5.10758	-1.3619
4	-1.51544	0.591905		4	3.09603	-0.899708
5	-2.55977	-0.626124		5	7.21441	-0.25028
6	-1.41936	0.394414		6	7.81082	-4.50728
7	-2.54175	0.623432		7	10.1562	-1.48875
8	-1.99275	0.953426		8	7.15063	-3.83254
9	-1.03751	0.844675		9	4.84228	-2.66318
10	-2.70628	0.62539		10	10.5836	-2.26225
11	-3.42852	0.567234		11	18.5982	-1.54946
12	-2.35677	-0.528978		12	6.98426	-0.52778	s
